# Supplementary material for: Sex Differences in Cochlear Transcriptomes in Horseshoe Bats
Source: MDPI journal article supplement (doi:10.3390/ani14081177), 2024-04-14

(a) Female-biased genes in *R. sinicus*

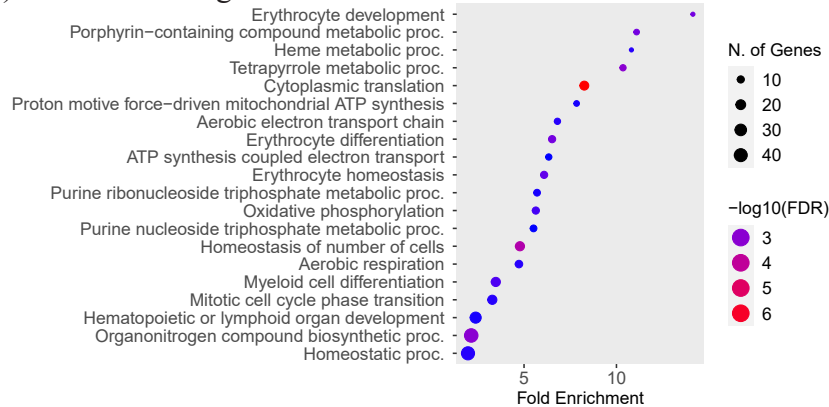

(b) Male-biased genes in *R. sinicus*

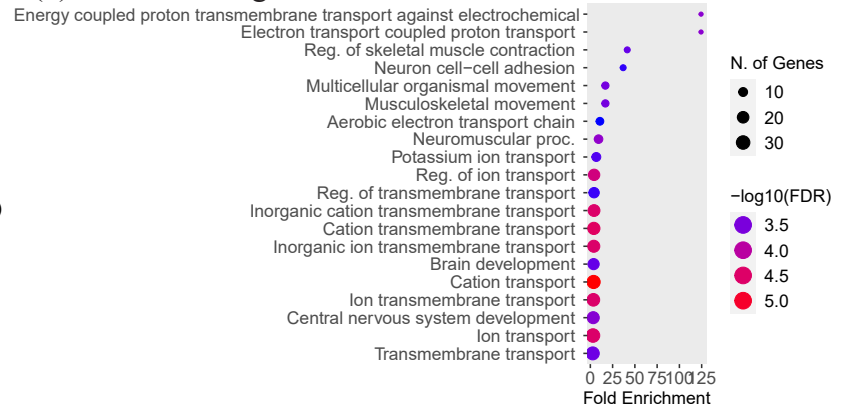

(c) Female-biased genes in *R. pusillus*

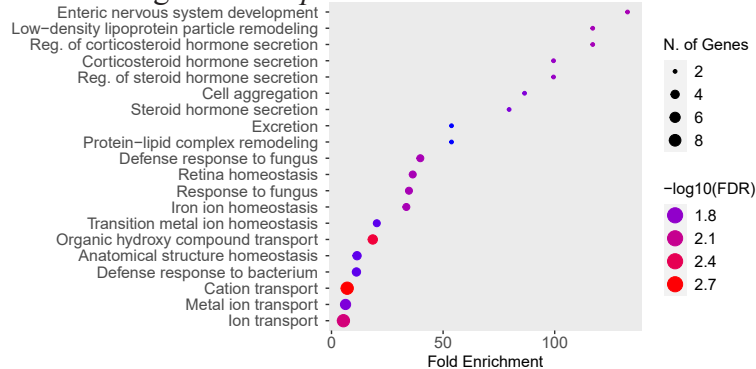

(d) Male-biased genes in *R. pusillus*

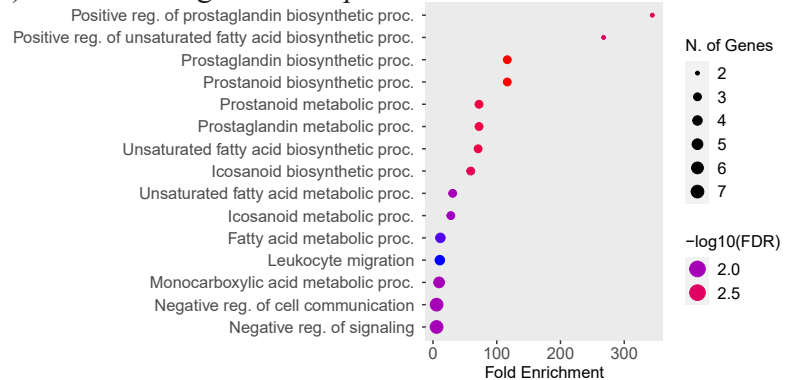

(e) Male-biased genes in *R. affinis hainanus*

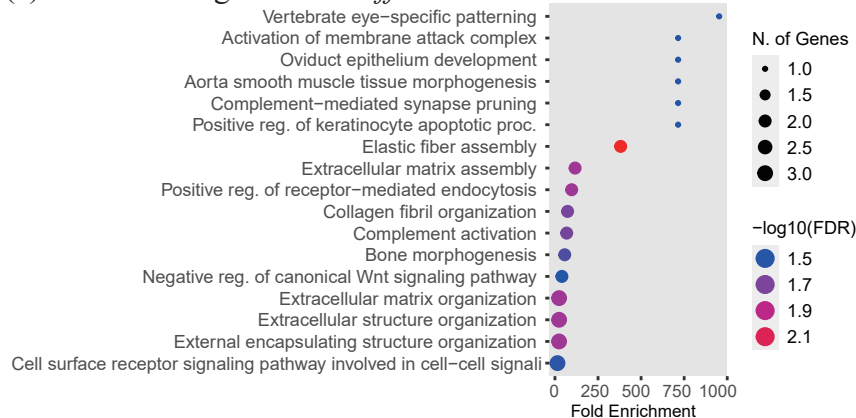

(f) Male-biased genes in *R. affinis himalayanus*

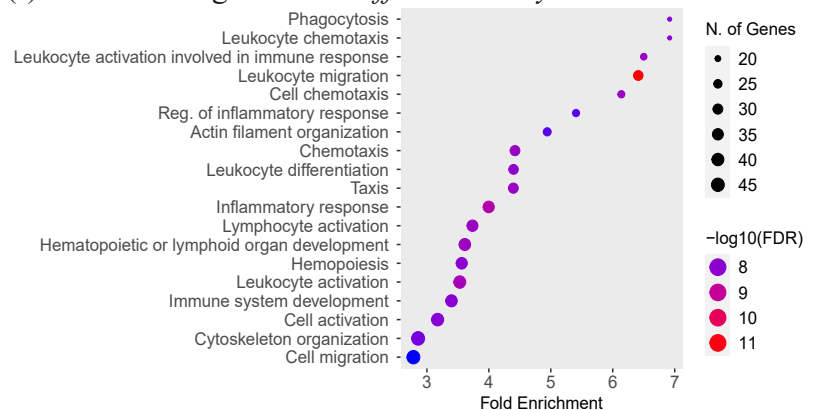

Supplement: s1 [file s1]
