# Supplementary figures and images for: Sex Differences in Cochlear Transcriptomes in Horseshoe Bats
Source: MDPI journal article supplement (doi:10.3390/ani14081177), 2024-04-14

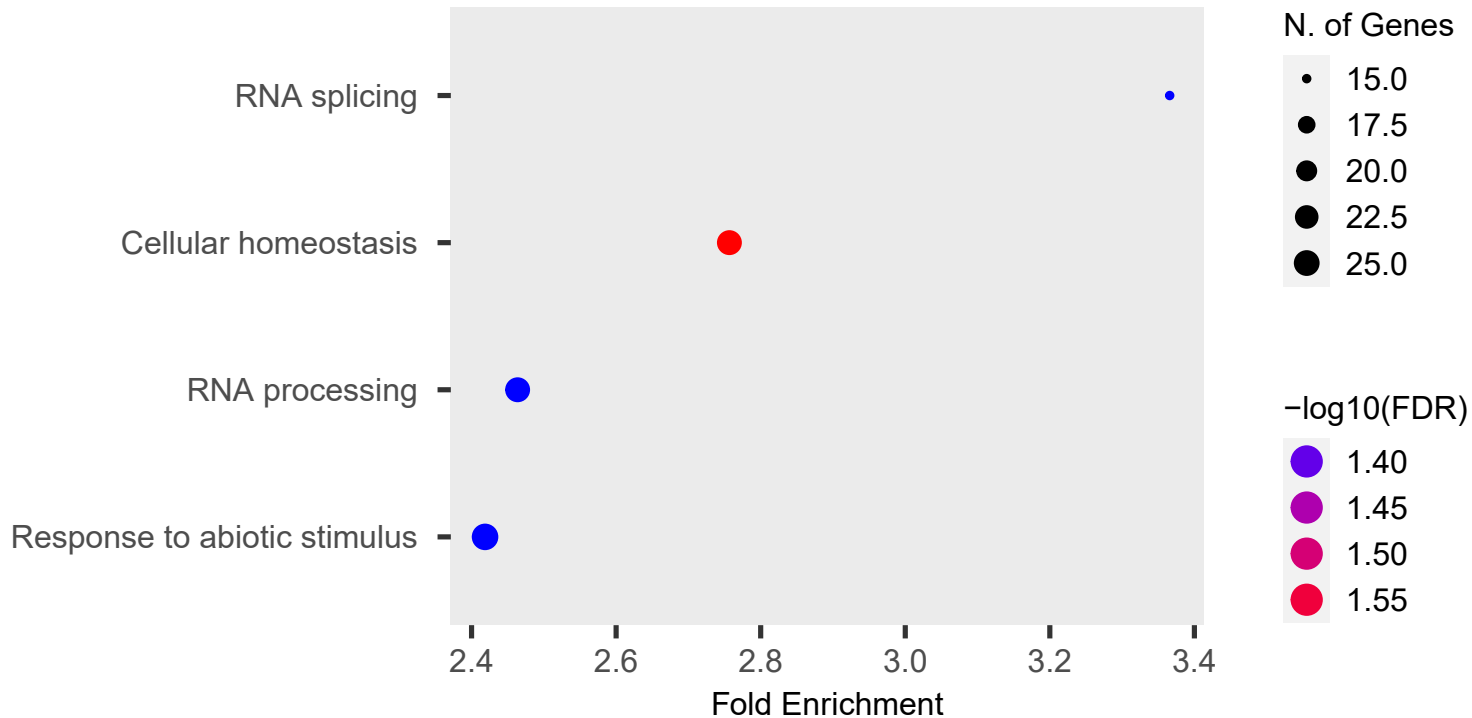

Supplement: s1 [file s1]

(a) *R. sinicus*

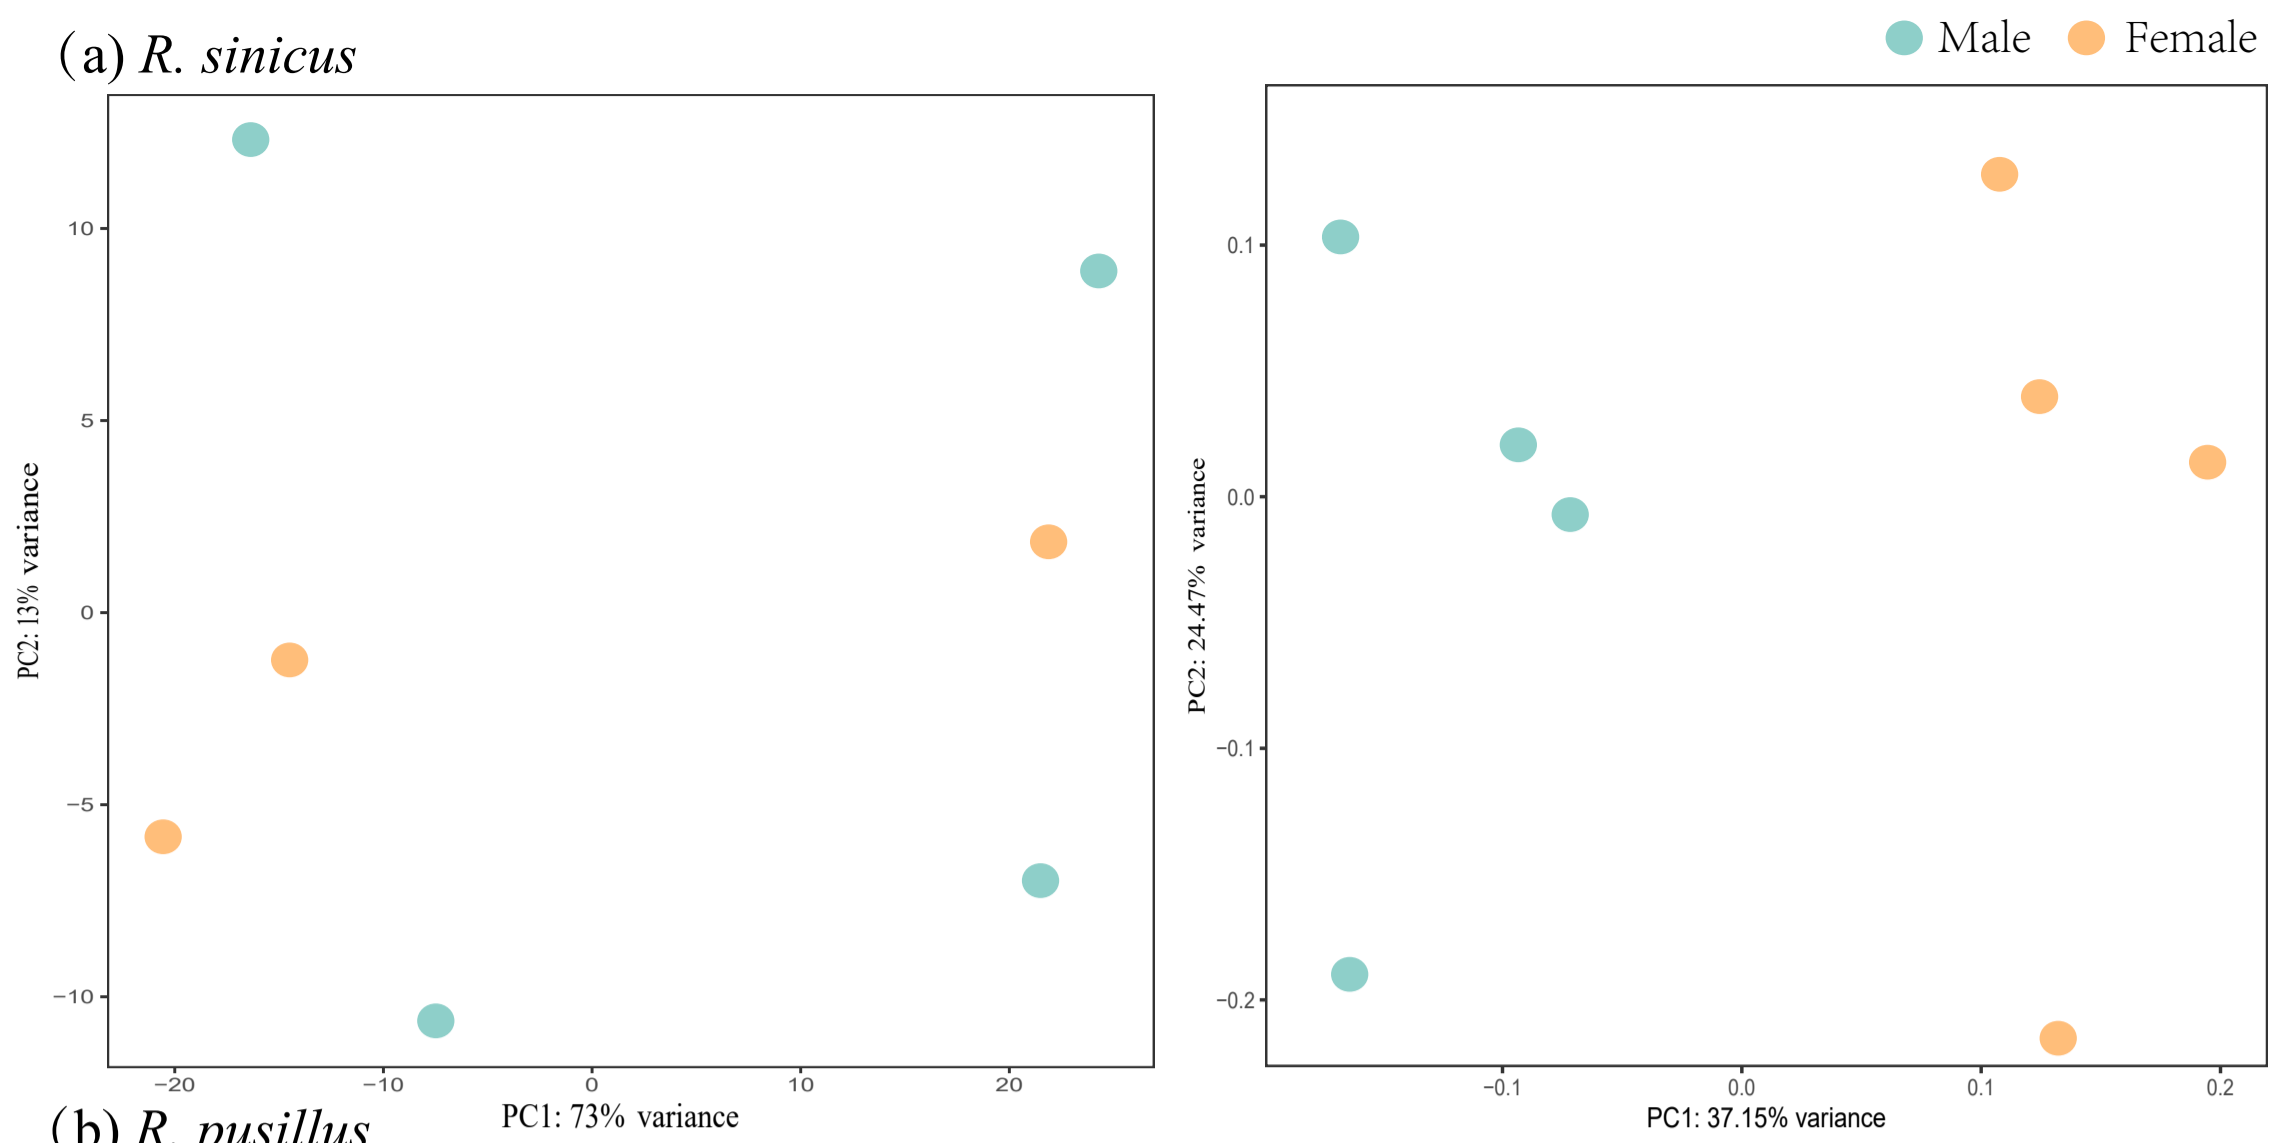

(b) *R. pusillus*

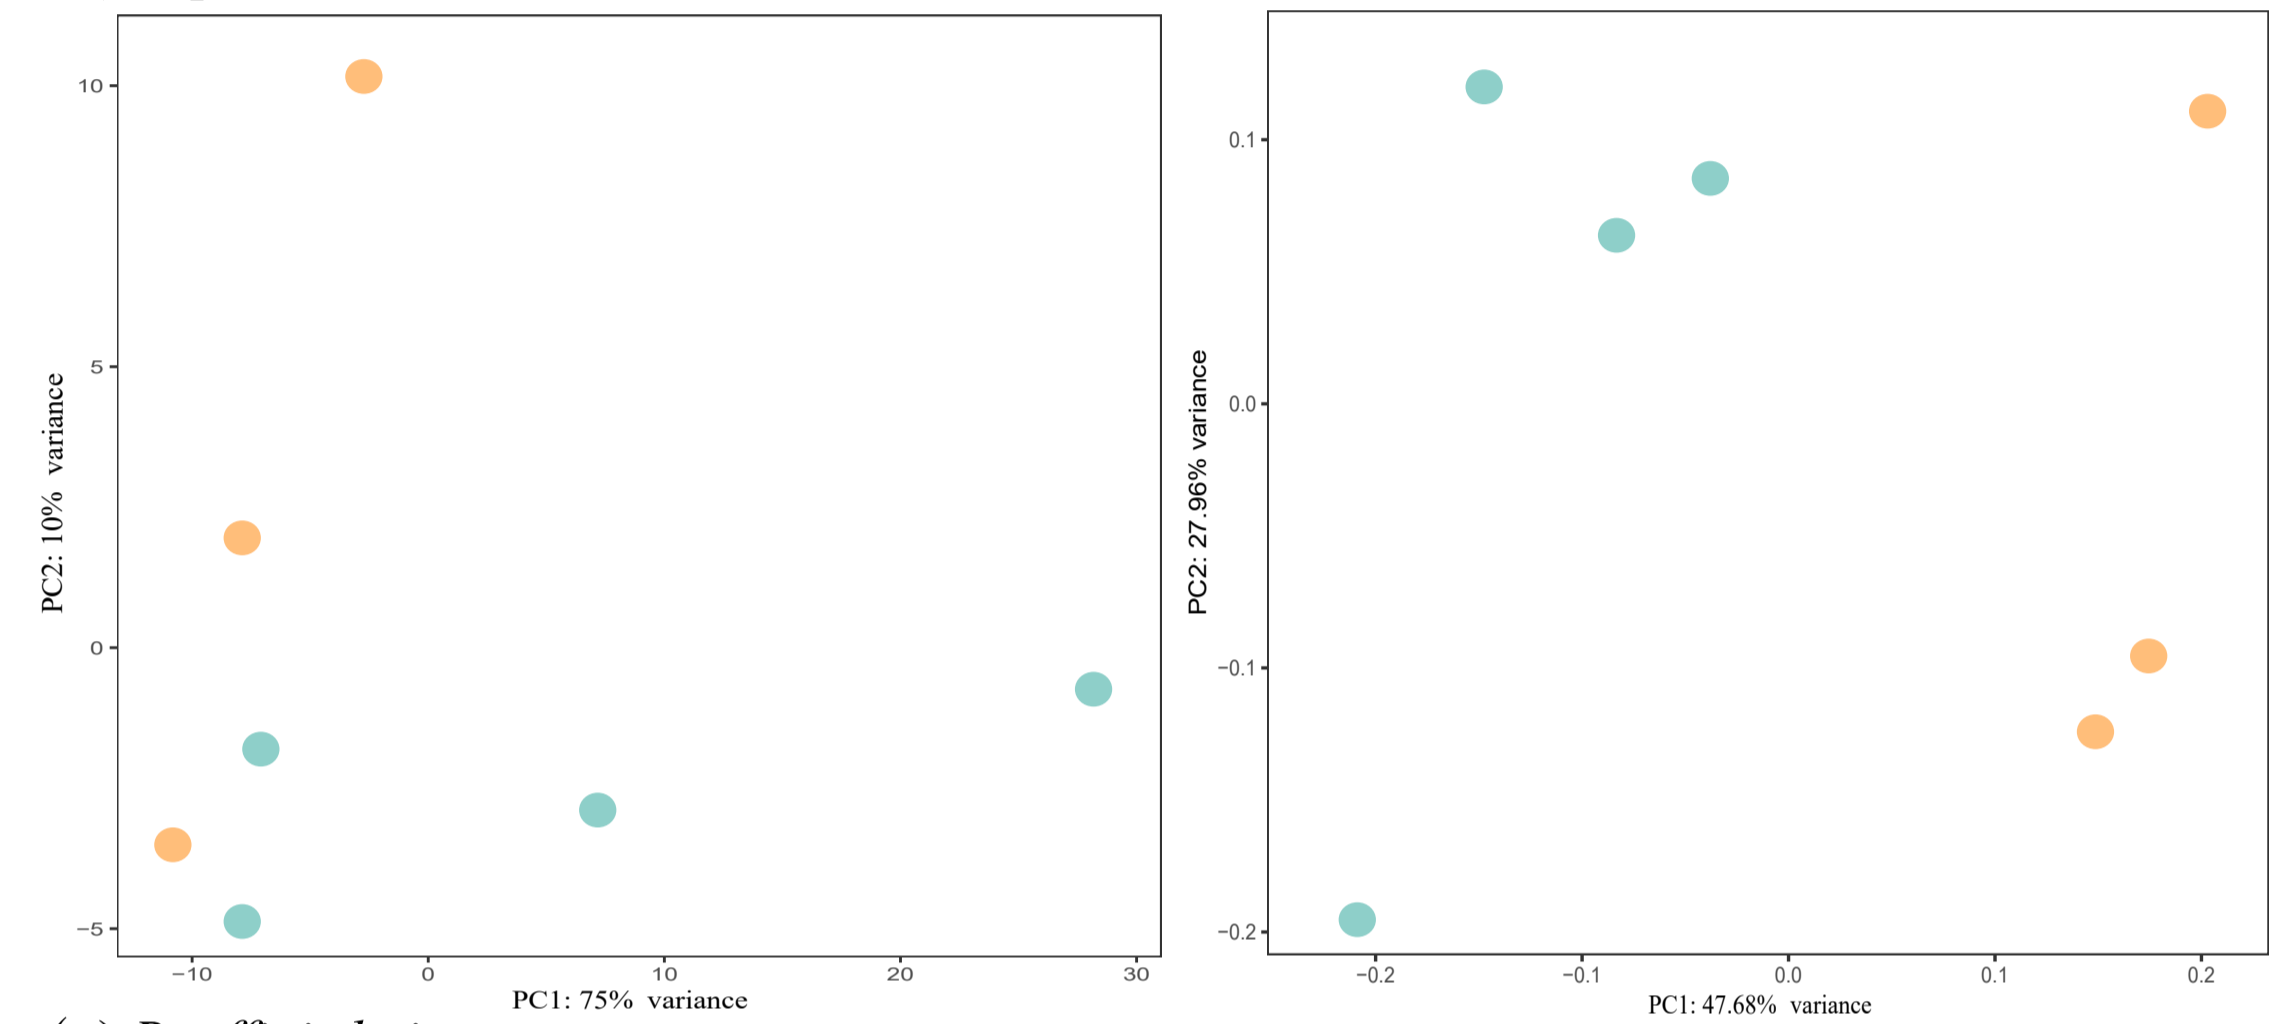

(c) *R. affinis hainanus*

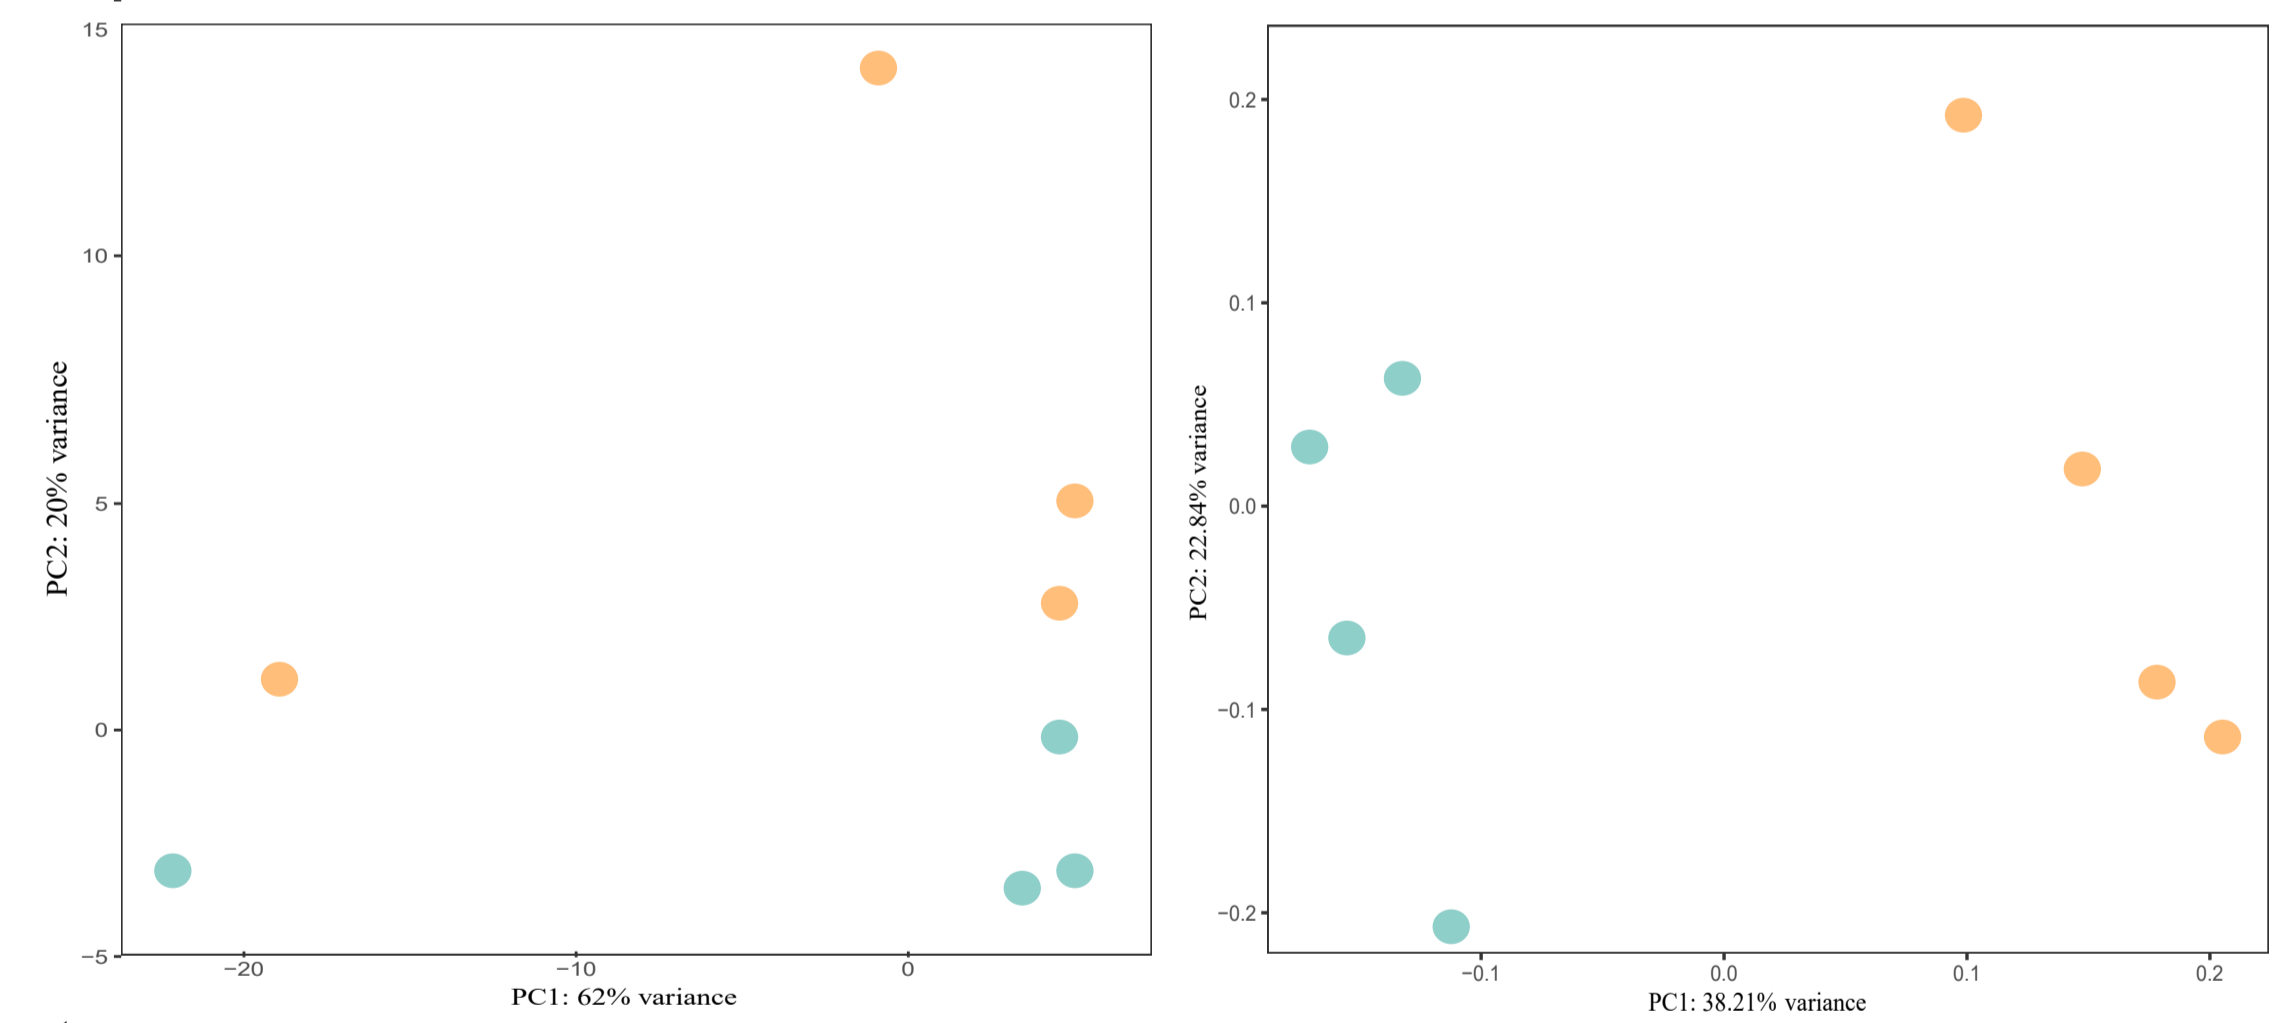

(d) *R. affinis himalayanus*

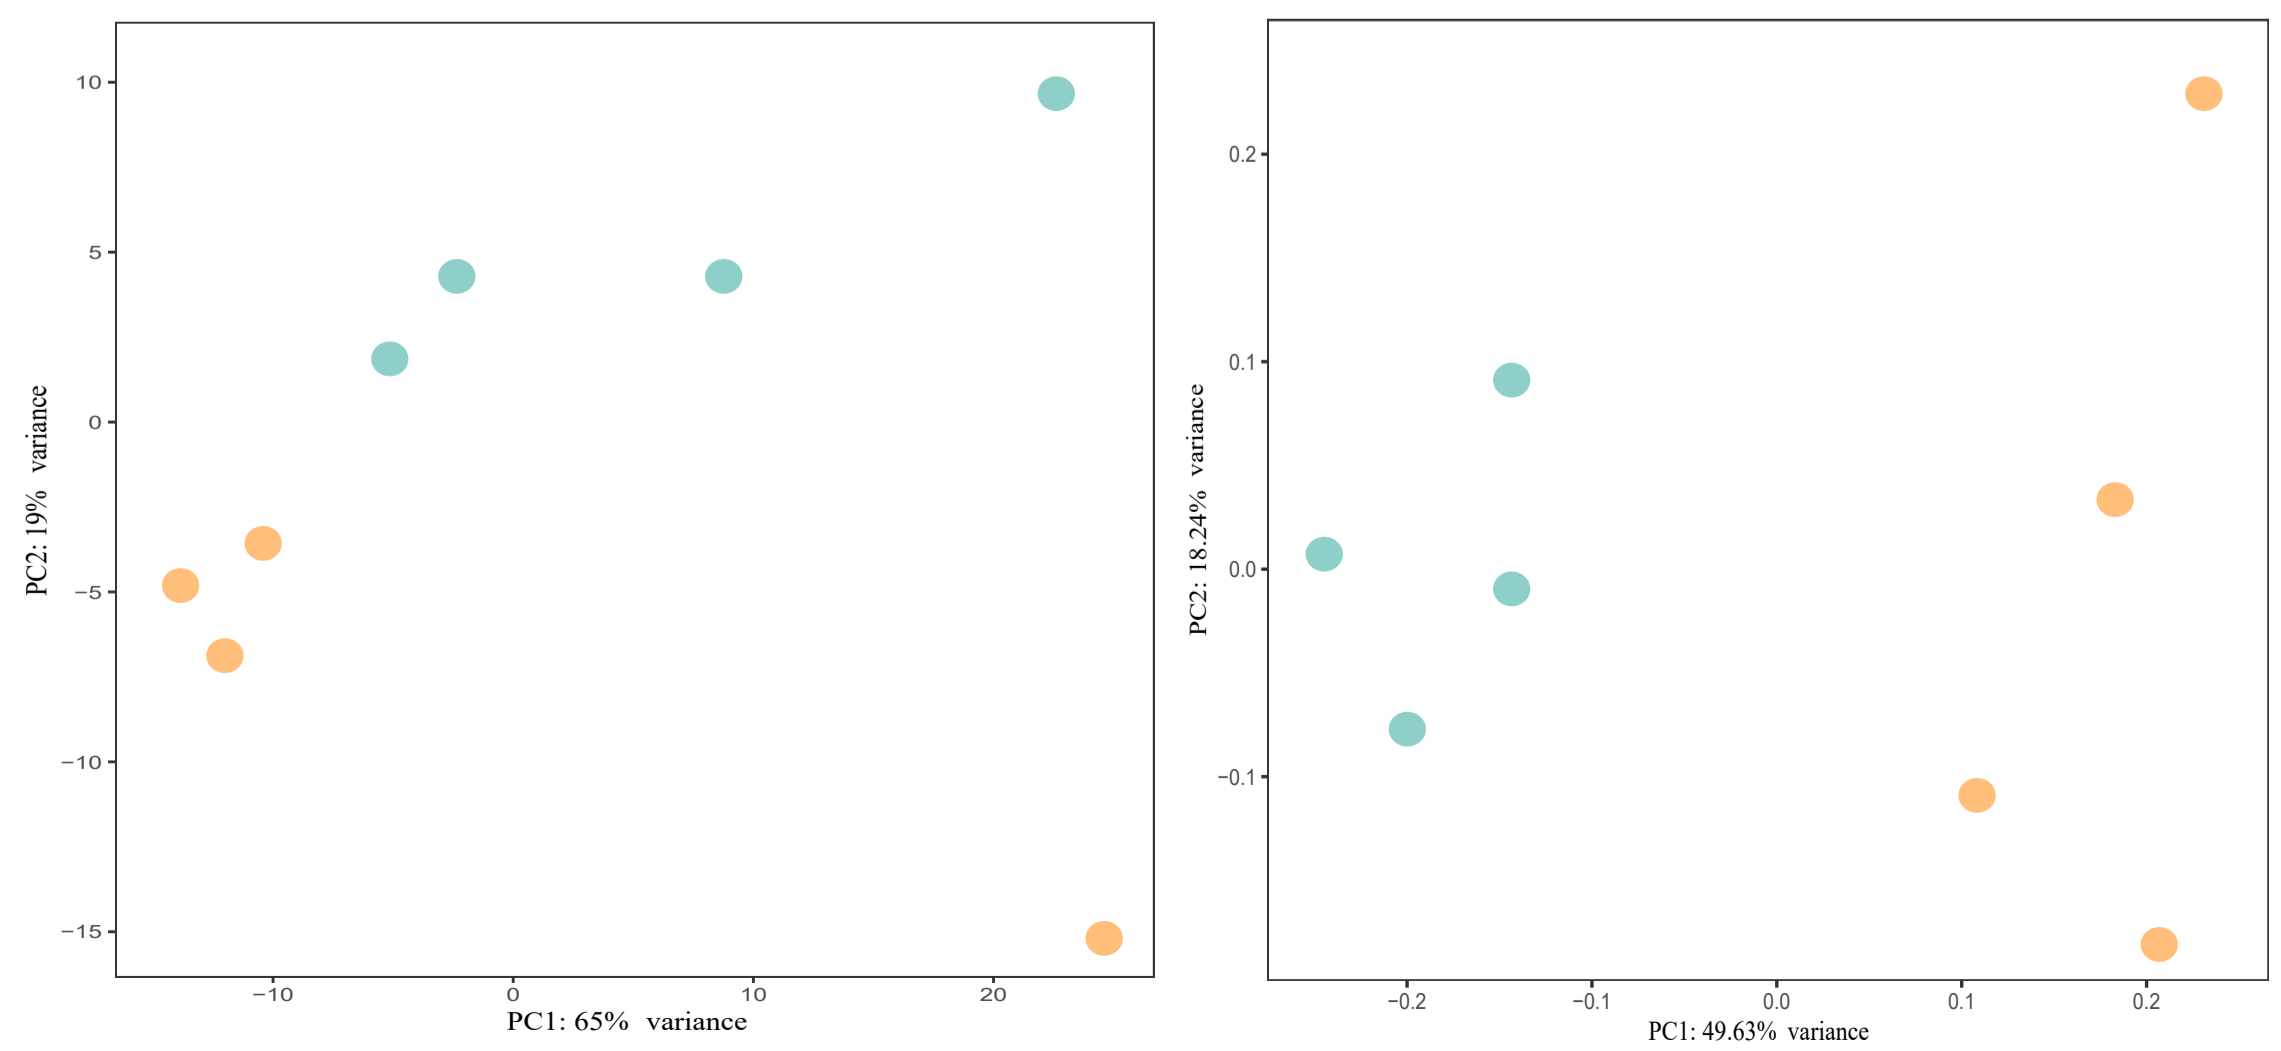

Supplement: s1 [file s1]

Male\_biased

Female\_biased

394

22

347

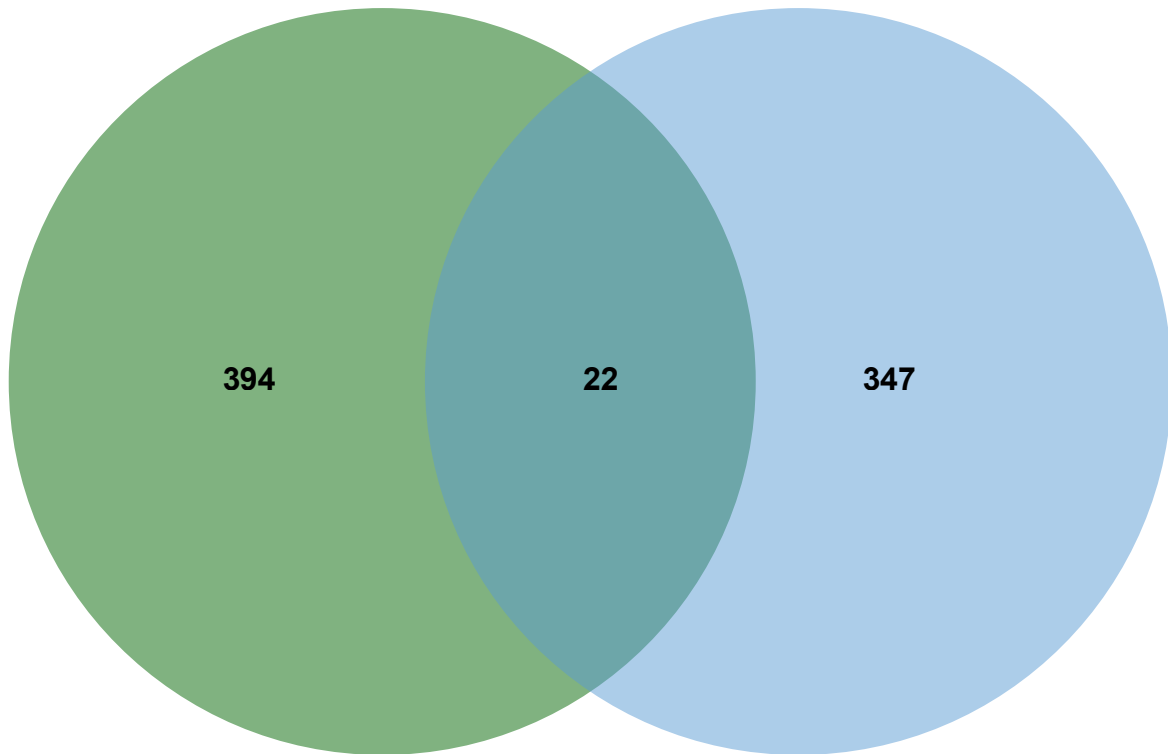

Supplement: s1 [file s1]

(a) *R. sinicus*

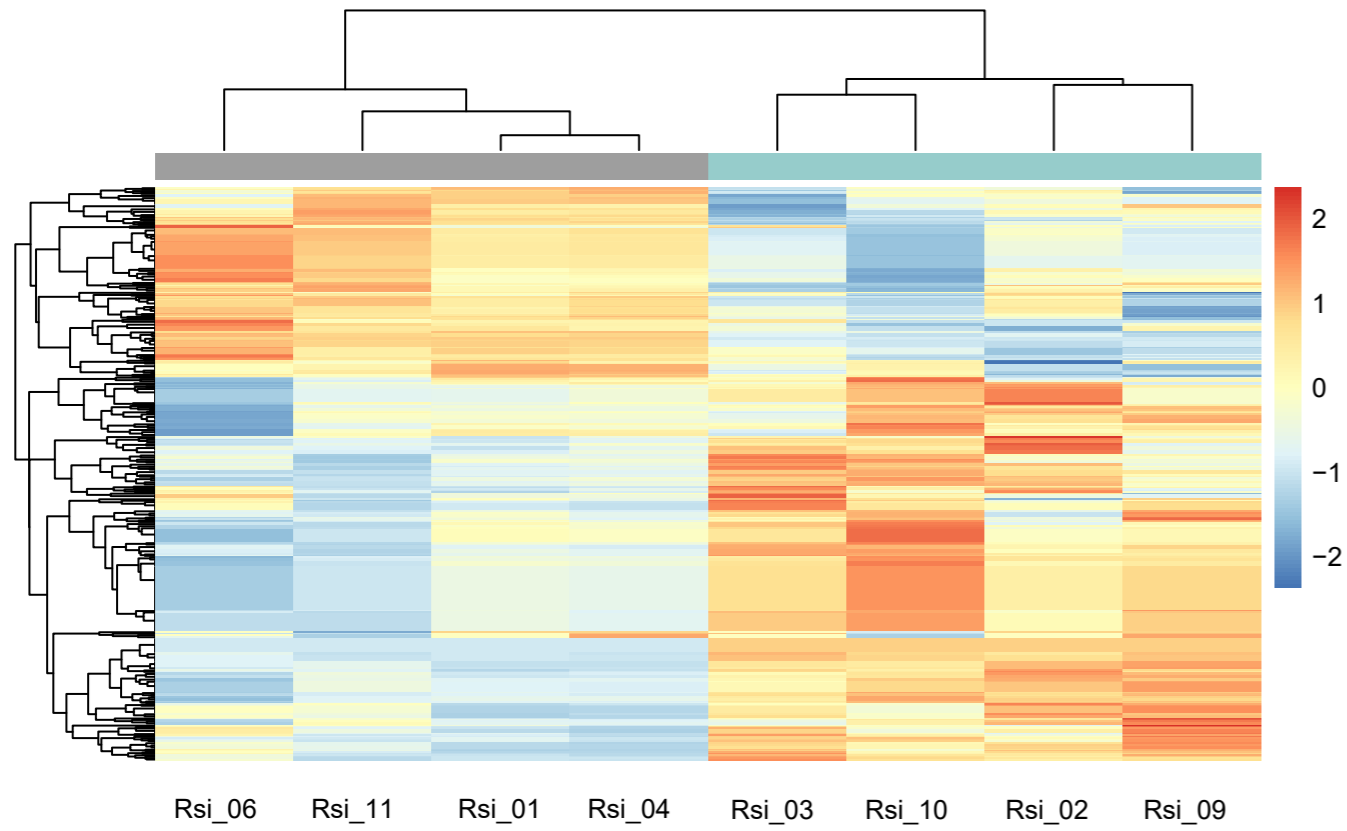

(b) *R. pusillus*

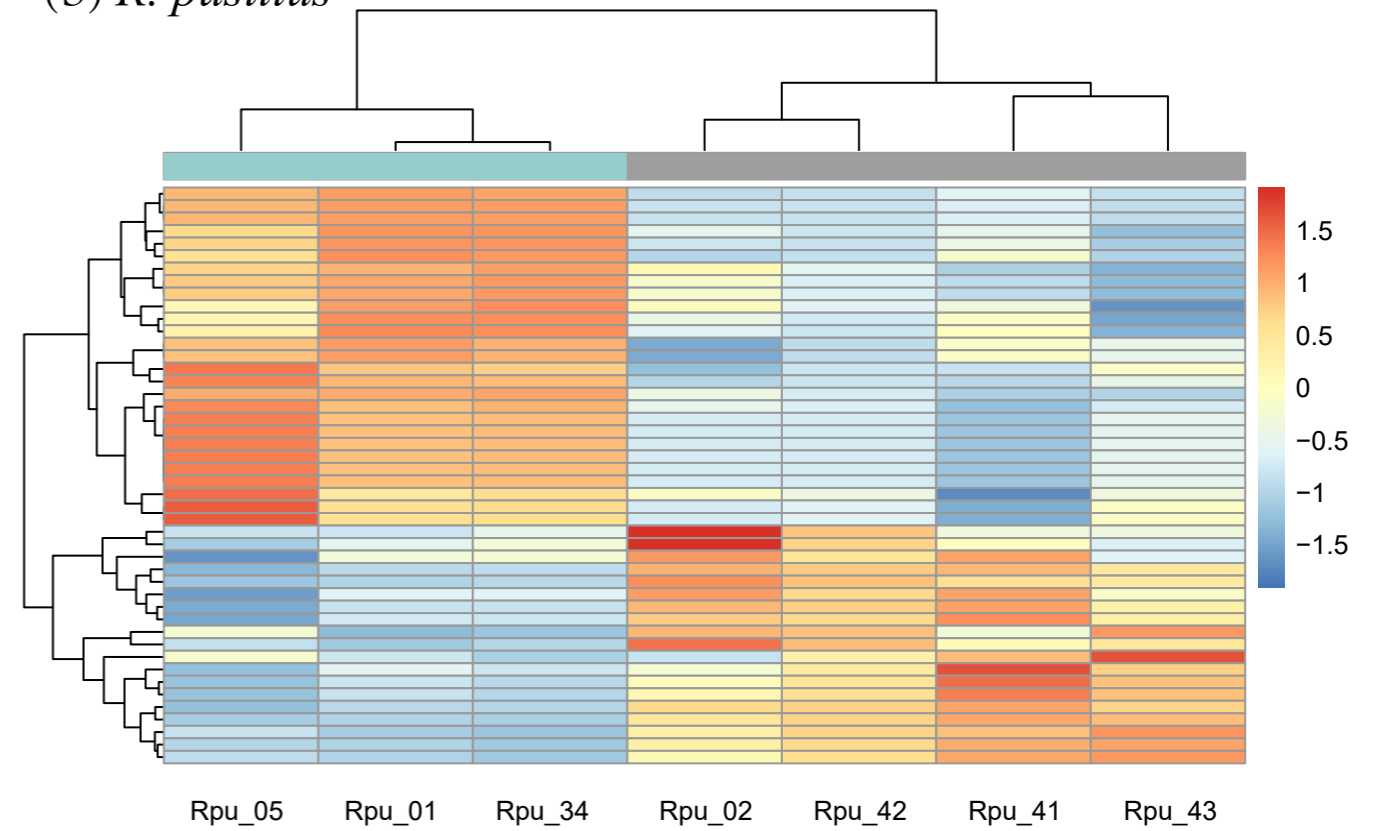

(c) *R. affinis hainanus*

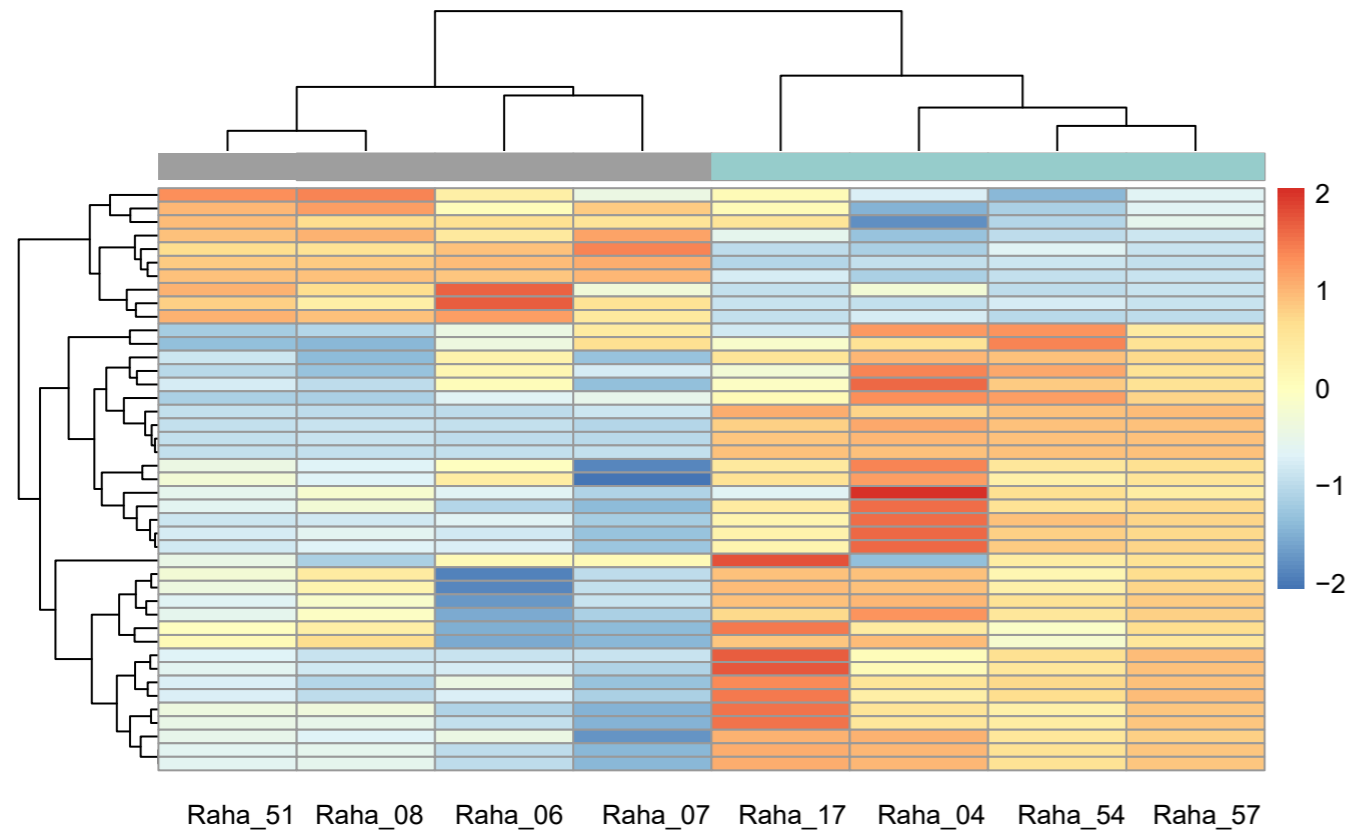

(d) *R. affinis himalayanus*

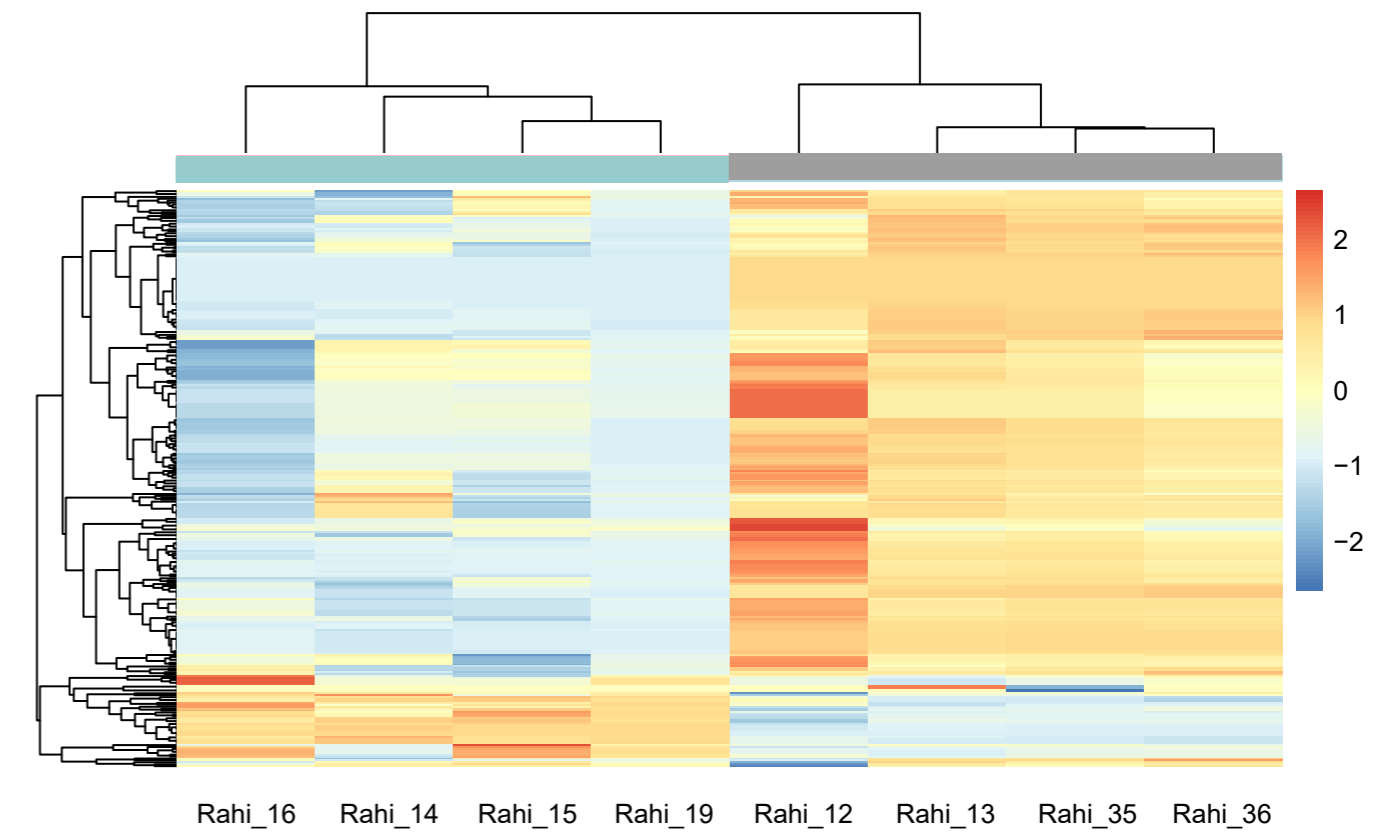

Supplement: s1 [file s1]
